# Supplementary material
Source: PubMed Central journal article supplement (PMC3632183)
Supplement: NIHMS453395-supplement-Supplemental_Figure_2.pdf [file NIHMS453395-supplement-Supplemental_Figure_2.pdf]

## Supplementary Figure 2

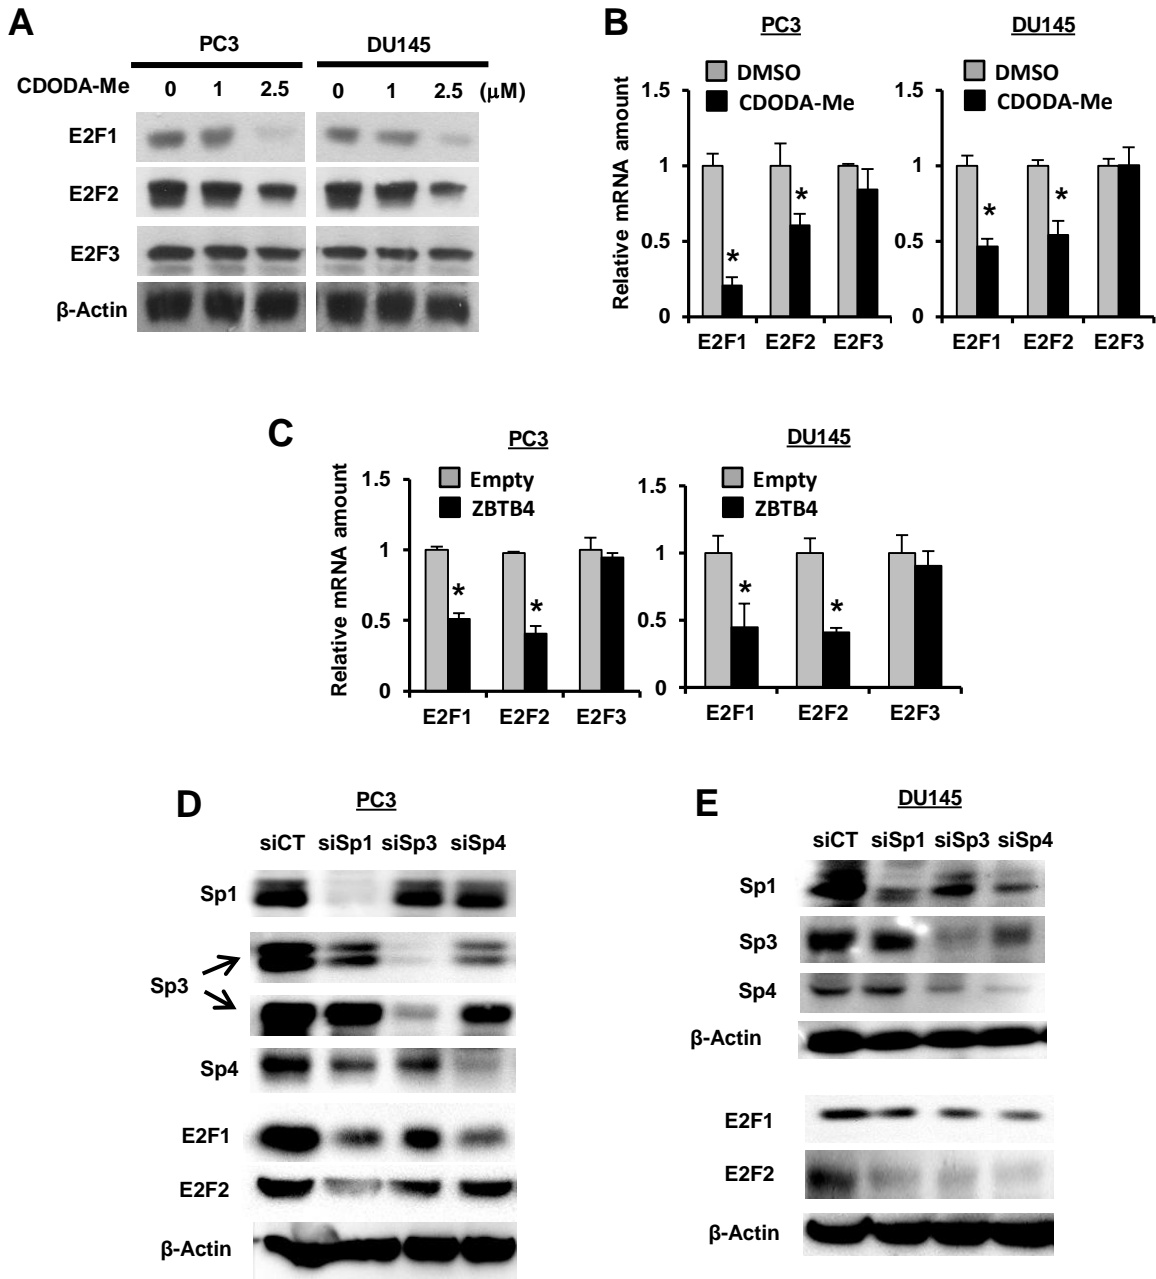

**Supplemental Figure 2.** PC3 and DU145 cells were treated with 2.5  $\mu$ M CDODA-Me for 32 hr, and E2F protein (A) and mRNAa (B) levels were determined by western blots and real time PCR, respectively, as outlined in the Materials and Methods. (C) PC3 and DU145 cells were transfected with ZBTB4 expression plasmid, and E2F mRNA levels were determined by real time PCR as outlined in the Materials and Methods. PC3 (D) and DU145 (E) cells were transfected with oligonucleotides targeted against Sp1 (siSp1), Sp3 (siSp3) and Sp4 (siSp4), and proteins were analyzed by western bots as described in the Materials and Methods. Results in (B) and (C) are means  $\pm$  SE for at least three replicate determinations, and significantly ( $p < 0.05$ ) decreased activity is indicated (\*).
