# Supplementary material
Source: PubMed Central journal article supplement (PMC3632183)
Supplement: NIHMS453395-supplement-Supplemental_Figure_3.pdf [file NIHMS453395-supplement-Supplemental_Figure_3.pdf]

### Supplementary Figure 3

#### DU145 – CDODA-Me (48 hr)

|                   |   |   |   |   |
|-------------------|---|---|---|---|
| DMSO              | + |   |   |   |
| GSH               |   | + |   | + |
| CDODA-Me (2.5 uM) |   |   | + | + |

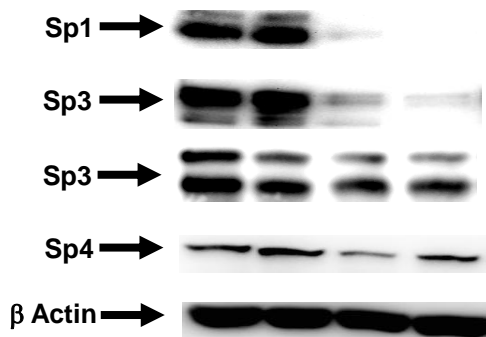

|                  |   |   |   |   |
|------------------|---|---|---|---|
| DMSO             | + |   |   |   |
| Glutoxin         |   | + |   | + |
| CDODA-Me (2.5uM) |   |   | + | + |

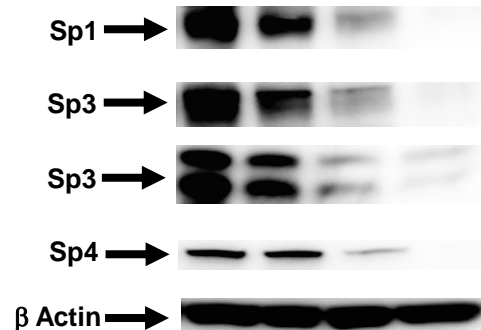

#### PC3 – CDODA-Me (48 hr)

|                   |   |   |   |   |
|-------------------|---|---|---|---|
| DMSO              | + |   |   |   |
| GSH               |   | + |   | + |
| CDODA-Me (2.5 uM) |   |   | + | + |

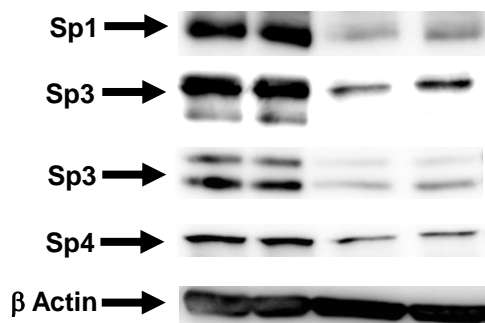

|                  |   |   |   |   |
|------------------|---|---|---|---|
| DMSO             | + |   |   |   |
| Glutoxin         |   | + |   | + |
| CDODA-Me (2.5uM) |   |   | + | + |

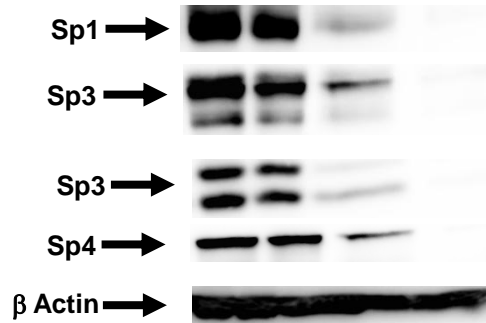

**Supplemental Figure 3.** Effects of proteasome and ROS inhibitors. Cells were treated with CDODA-Me ± GSH or the proteasome inhibitor MG132 for 48 hr, and whole cell lysates were analyzed by western blots as outlined in the Materials and Methods.
